# Supplementary material for: Coordination polymers and metallomacrocycles based on bis(pyridylcarbamate) ligands with flexible glycol spacers
Source: Royal Society of Chemistry journal article supplement (doi:10.1039/c1ce05392b), 2011-01-01
Supplement: c1ce05392b.pdf [file c1ce05392b.pdf]

*Electronic Supplementary Information*

## Coordination polymers and metallomacrocycles based on bis(pyridylcarbamate) ligands with flexible glycol spacers

Yana Xia,<sup>a</sup> Shaoguang Li,<sup>a</sup> Biao Wu,<sup>\*a,b</sup> Yanyan Liu,<sup>a,b</sup> and Xiao-Juan Yang<sup>a</sup>

S1. Crystal structure of compound **3**.

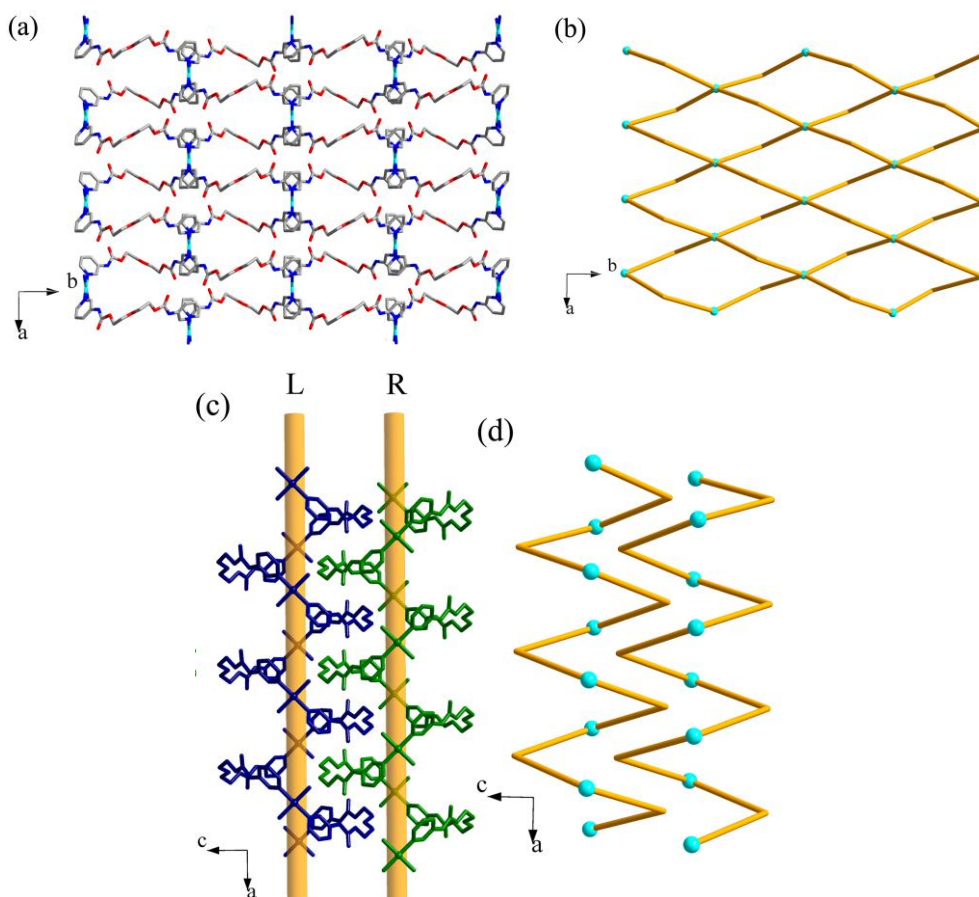

**Figure S1.** (a) The 2D homochiral layer in the *ab* plane of **3**; (b) Simplified topology of 2D homochiral layer showing the (4,4) net; (c) The interdigitation of two helical channels from two adjacent 2D homochiral layers; (d) Simple topology of the interdigitation.

## S2. TGA analyses of compounds 1–6.

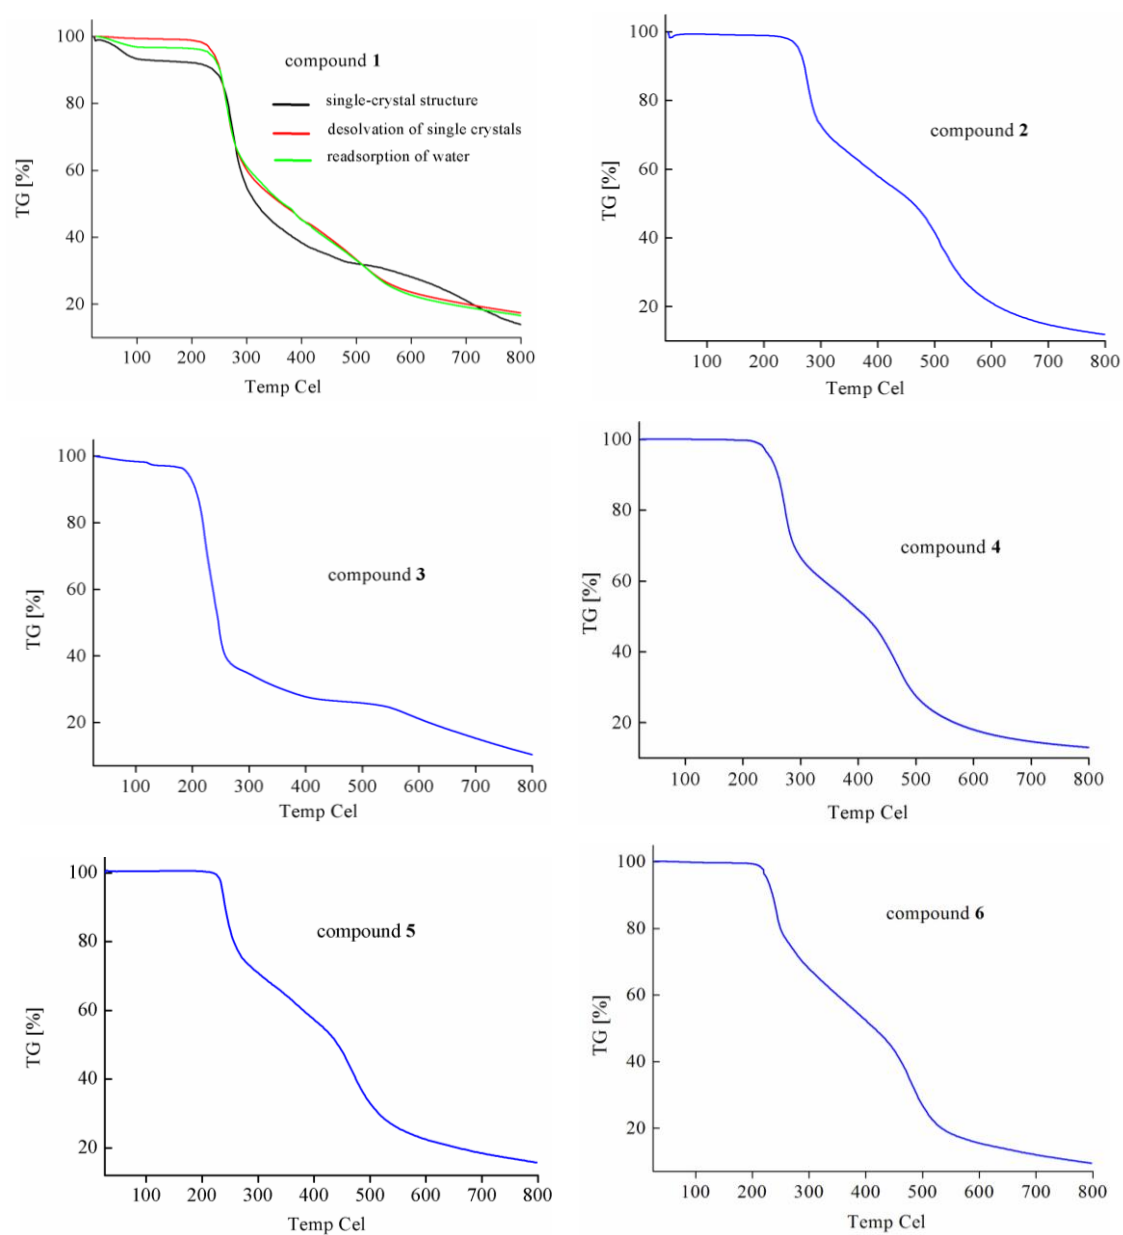

**Figure S2.** TGA curves of the compounds 1-6.

## S3. PXRD studies of compounds 2–6.

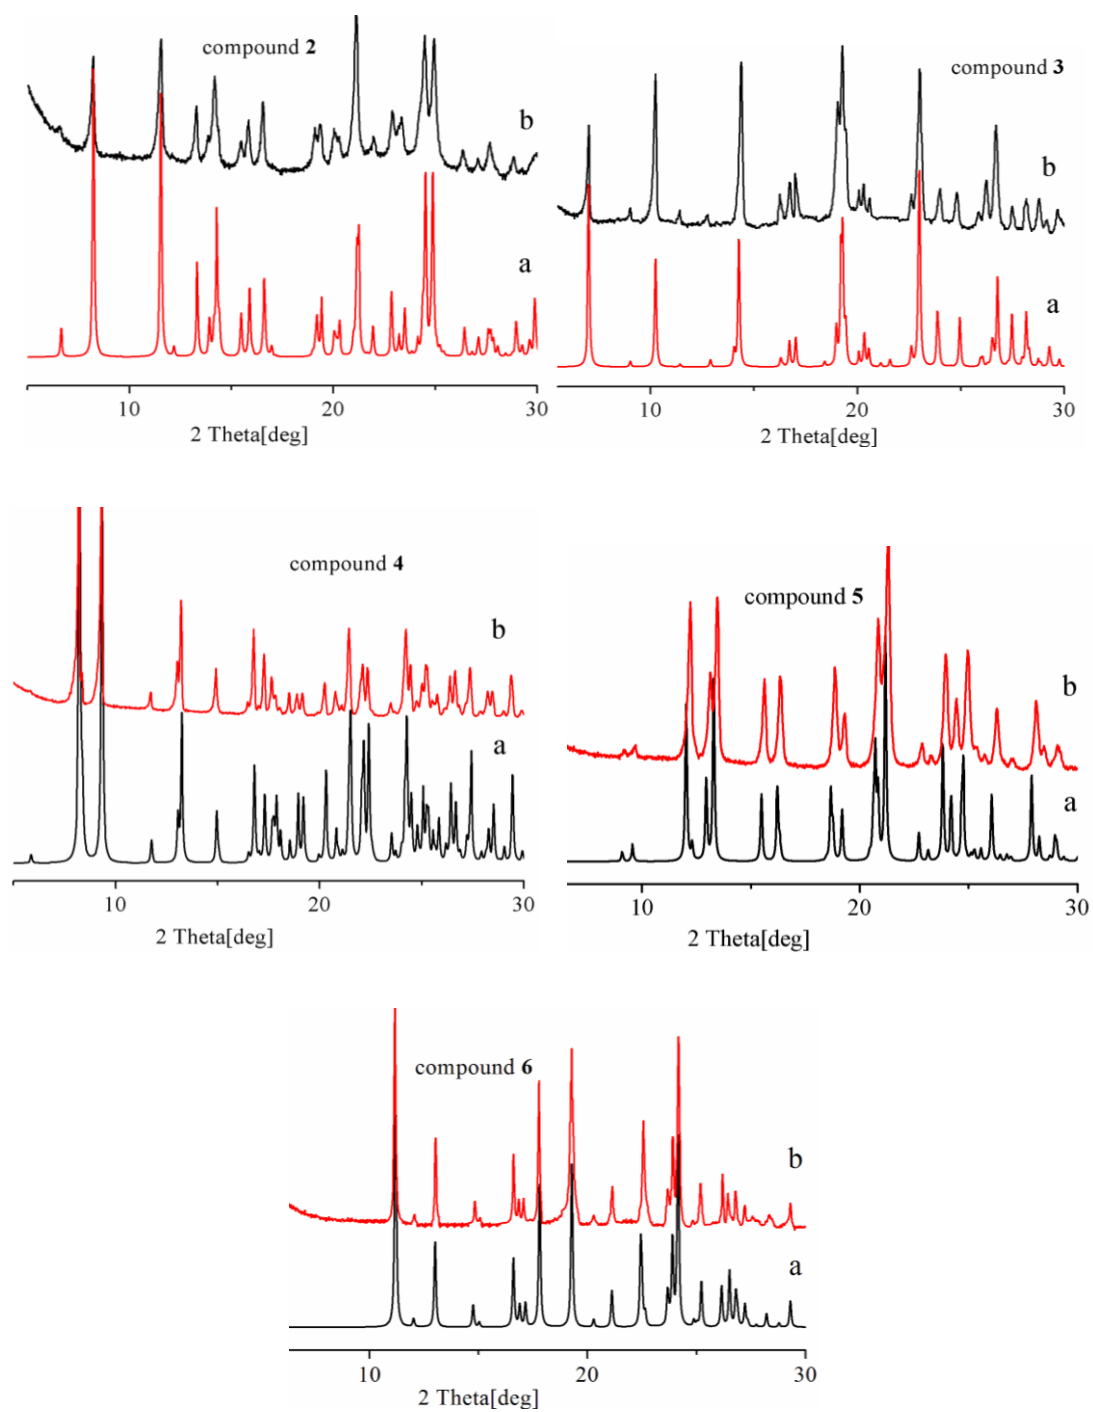

**Figure S3.** Powder X-ray diffraction patterns: (a) simulated from the single-crystal diffraction data; (b) as-synthesized.
